# Supplementary material for: Lower DNA methylation levels in CpG island shores of CR1, CLU, and PICALM in the blood of Japanese Alzheimer’s disease patients
Source: PubMed Central journal article supplement (PMC7523949; doi:10.1371/journal.pone.0239196), 2020-09-29

*BIN1* (-2,000~61,329)

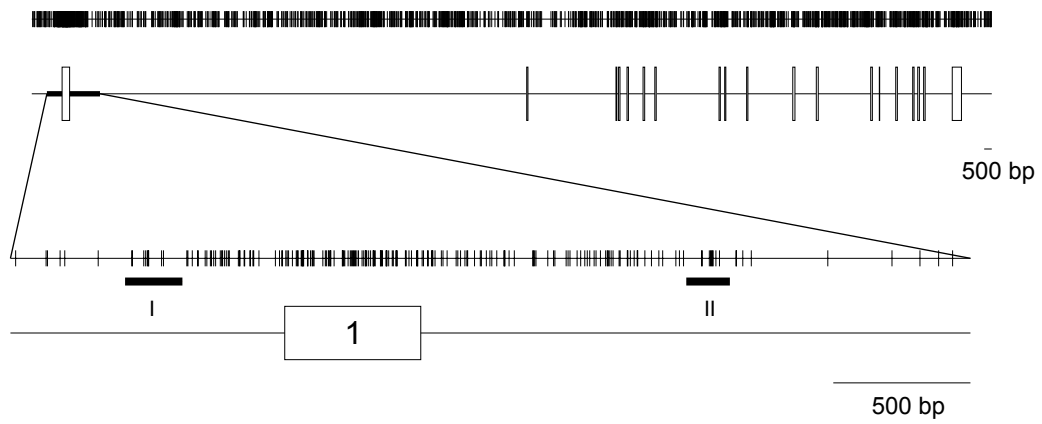

Supplement: pone.0239196.s005.pdf [file pone.0239196.s005.pdf]
