# Supplementary material for: Lower DNA methylation levels in CpG island shores of CR1, CLU, and PICALM in the blood of Japanese Alzheimer’s disease patients
Source: PubMed Central journal article supplement (PMC7523949; doi:10.1371/journal.pone.0239196), 2020-09-29
Supplement: pone.0239196.s006.pdf [file pone.0239196.s006.pdf]

*TREM2* (-2,000~6,680)

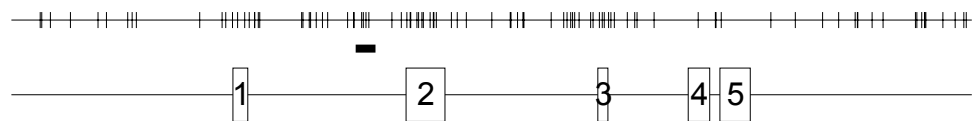

500 bp
