# Supplementary material for: Lower DNA methylation levels in CpG island shores of CR1, CLU, and PICALM in the blood of Japanese Alzheimer’s disease patients
Source: PubMed Central journal article supplement (PMC7523949; doi:10.1371/journal.pone.0239196), 2020-09-29

**A**

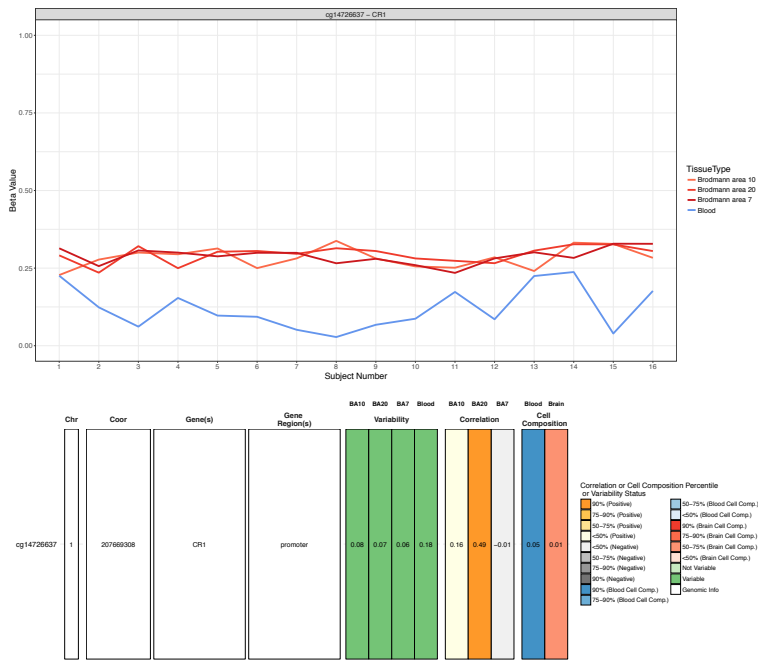

**B**

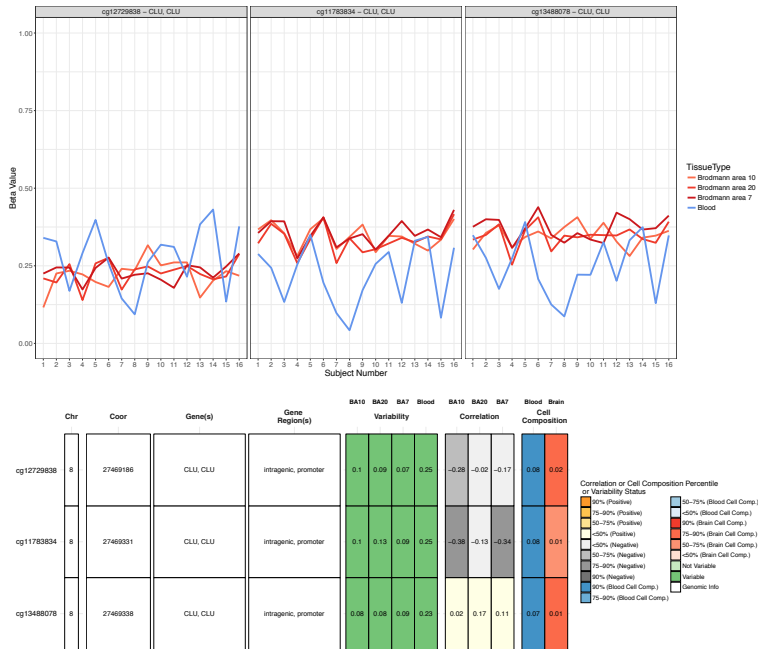

**C**

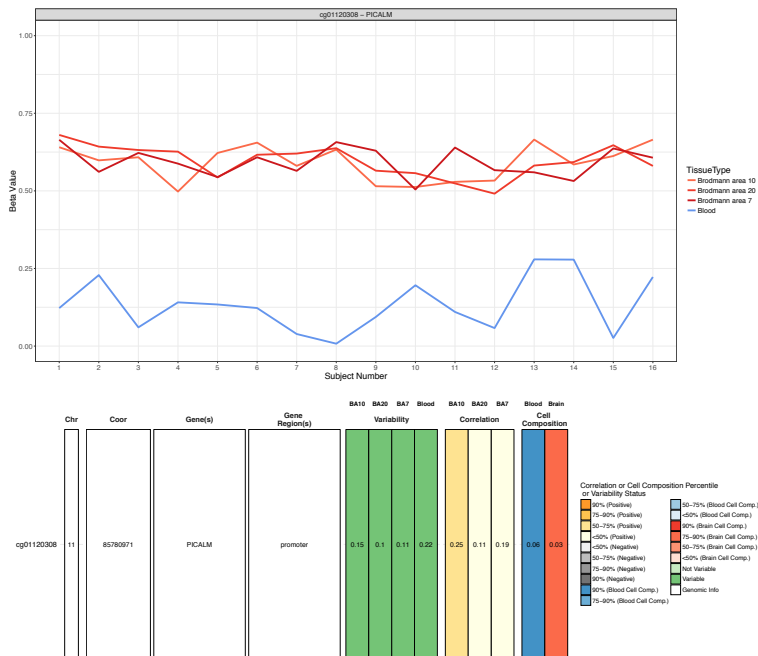

Supplement: pone.0239196.s010.pdf [file pone.0239196.s010.pdf]
